# Supplementary material for: Glutamine metabolism inhibition has dual immunomodulatory and antibacterial activities against Mycobacterium tuberculosis
Source: PubMed Central journal article supplement (PMC10654700; doi:10.1038/s41467-023-43304-0), 2023-11-16
Supplement: 41467_2023_43304_MOESM1_ESM.pdf [file 41467_2023_43304_MOESM1_ESM.pdf]

1 **SUPPLEMENTARY INFORMATION**

2 **Glutamine metabolism inhibition has dual immunomodulatory and antibacterial activities**  
3 **against *Mycobacterium tuberculosis***

4 Sadiya Parveen<sup>1</sup>, Jessica Shen<sup>1</sup>, Shichun Lun<sup>1</sup>, Liang Zhao<sup>2</sup>, Jesse Alt<sup>3</sup>, Benjamin Koleske<sup>1</sup>, Robert  
5 D. Leone<sup>2,4</sup>, Rana Rais<sup>5,6,7</sup>, Jonathan D. Powell<sup>4, §</sup>, John R. Murphy<sup>1</sup>, Barbara S. Slusher<sup>2,3,4,5,6,7,8,9</sup>,  
6 William R. Bishai<sup>1\*</sup>

7 <sup>1</sup>Center for Tuberculosis Research, Department of Medicine, Johns Hopkins School of Medicine, Baltimore, MD, USA

8 <sup>2</sup>Department of Oncology, Johns Hopkins School of Medicine, Baltimore, MD, USA

9 <sup>3</sup>Johns Hopkins University, Baltimore, MD, USA.

10 <sup>4</sup>The Bloomberg-Kimmel Institute for Cancer Immunotherapy, Johns Hopkins School of Medicine, Baltimore, MD,  
11 USA

12 <sup>5</sup>Johns Hopkins Drug Discovery, Johns Hopkins School of Medicine, Baltimore, MD, USA.

13 <sup>6</sup>Department of Neurology, Johns Hopkins School of Medicine, Baltimore, MD, USA.

14 <sup>7</sup>Department of Pharmacology and Molecular Sciences, Johns Hopkins School of Medicine, Baltimore, MD, USA.

15 <sup>8</sup>Department of Neuroscience, Johns Hopkins School of Medicine, Baltimore, MD, USA.

16 <sup>9</sup>Department of Psychiatry and Behavioral Sciences, Johns Hopkins School of Medicine, Baltimore, MD, USA.

17 § Current address: Calico, S. San Francisco, CA

18 **Keywords:** Tuberculosis, TB drug, Immunotherapy, Glutamine inhibition, Host-directed therapy

19 \*Corresponding author

20 William R. Bishai

21 Johns Hopkins School of Medicine

22 1550 Orleans St, CRB2 Rm 108

23 Baltimore, MD 21287

24 Phone: 4109553507

25 [wbishai1@jhmi.edu](mailto:wbishai1@jhmi.edu)

Fig S1.

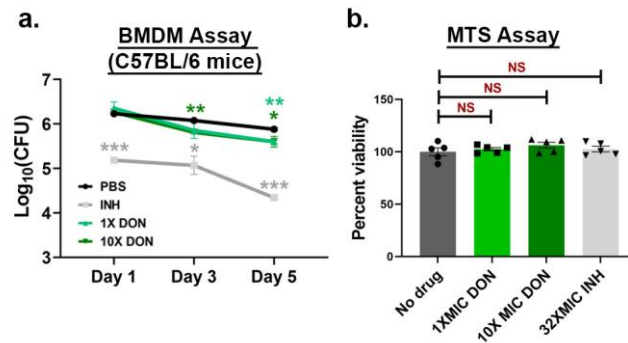

27

28 **Fig S1. The effect of JHU083 on the intracellular survival of *Mtb* and on bone-marrow**  
 29 **derived macrophage (BMDM) viability.** BMDMs were harvested from the femurs of 8-12  
 30 weeks old C57BL6 mice (n=10/experiment), activated using IFN $\gamma$ . (a) IFN $\gamma$ -activated BMDMs  
 31 were infected with *Mtb* H37Rv at an MOI of 2 (n=3 wells/group). They were then treated with  
 32 1X and 10X MIC concentrations of DON assuming a MIC value of 1 mg/ml. Isoniazid (INH)  
 33 was used as the positive control. The cells were lysed at indicated time points and plated on  
 34 7H11 selection plates. (b) BMDM viability as assessed by an MTS assay was performed after 5  
 35 days of daily drug treatment at the indicated concentration (n=5 wells/group). The experiment  
 36 was performed in triplicate. Statistical significance was calculated using a two-tailed student t-  
 37 test considering unequal distribution. The exact p-values are provided in the Source Data file.  
 38 \*<0.05, \*\*<0.01, \*\*\*<0.001. CFU stands for colony-forming units. All the experiments were  
 39 performed in triplicates. MTS stands for 3-(4,5-Dimethylthiazol-2-yl)-5-(3-  
 40 carboxymethoxyphenyl)-2-(4-sulfophenyl)-2H-tetrazolium salt. CFU stands for colony-forming  
 41 units. NS stands for non-significant change, p-value was >0.05.

42

43

44

45

46

Fig S2.

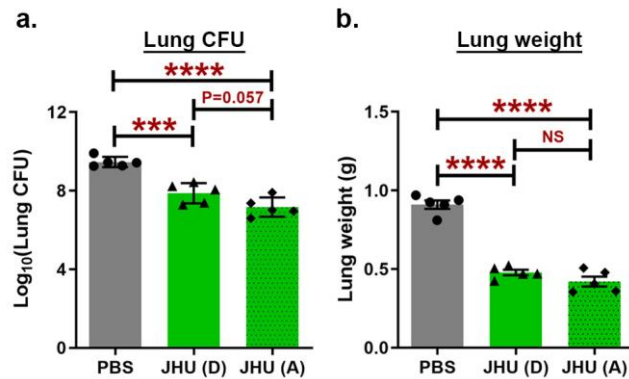

48

49 **Fig S2. Both daily and alternate JHU083 dosing regimen are effective in vivo.** 129S2 mice  
 50 (n=5/group) were aerosol infected with ~200-300 CFU of *Mtb* H37Rv. Two different dosing  
 51 regimens; (1) Daily (JHU-D; 1 mg/kg dose per day for the first week, followed by 0.3 mg/kg  
 52 daily 5/7 dosing M-F) and (2) Alternate (JHU-A; 1 mg/kg dose per day for the first week,  
 53 followed by 3/7 dosing with 1 mg/kg on Mon, Wed and Fri) were administered. The mice were  
 54 sacrificed at day 0 and week 5 post-infection/treatment. The lungs were harvested,  
 55 homogenized, serially diluted, and plated on 7H11 selection plates. After 21-25 days, colonies  
 56 were counted, and counts were transformed into  $\text{log}_{10}$  values and plotted. Graphs depicting the  
 57 effect of both dosing regimen upon (a) lung bacillary burden and (b) lung weight at 5 weeks post  
 58 infection/treatment. Data is plotted as mean  $\pm$  SEM. Statistical significance was calculated  
 59 using a two-tailed student t-test considering unequal distribution. The exact p-values are  
 60 provided in the Source Data file. \* $<0.05$ . CFU stands for colony-forming units. CFU stands for  
 61 colony-forming units. NS stands for non-significant change, p-value was  $>0.05$ . The experiment  
 62 was performed twice.

63

64

65

66

67

Fig S3.

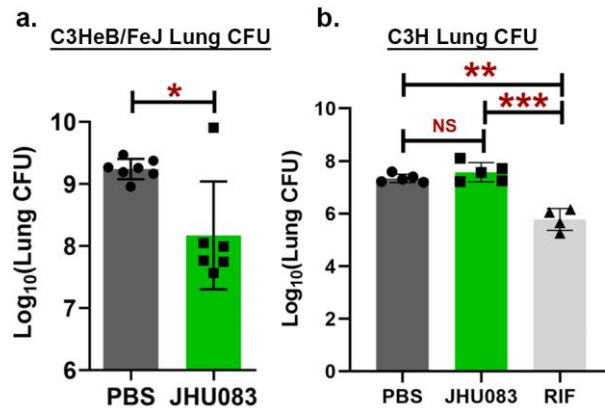

68

69 **Fig S3. Impact of JHU083 treatment on lung bacillary burden in *Mtb*-infected C3HeB/FeJ**  
70 **and C3H mice.** C3HeB/FeJ (n=7/group) and C3H mice (n=5/group) were aerosol-infected with  
71 150-200 CFU of *Mtb* H37Rv. The mice were then treated with JHU083 via oral gavage starting  
72 one day after infection. 1 mg/kg JHU083 was given daily for the first 5 days and then the dose  
73 was reduced to 0.3 mg/kg daily (5/7, M-F). The mice were sacrificed on day 0 and week 5 post-  
74 infection/treatment. The lungs were harvested, homogenized, serially diluted, and plated on  
75 7H11 selection plates. After 21-25 days, colonies were counted, and counts were transformed  
76 into  $\text{log}_{10}$  values and plotted. Lung bacillary burden in **(a)** C3HeB/FeJ mice at 4.5 weeks post  
77 infection/treatment and **(b)** C3H mice at 5 weeks post infection/treatment. Data is plotted as  
78 mean  $\pm$  SEM. Statistical significance was calculated using a two-tailed student t-test considering  
79 unequal distribution. The exact p-values are provided in the Source Data file. \* $<0.05$ . CFU  
80 stands for colony-forming units. CFU stands for colony-forming units. NS stands for non-  
81 significant change, , p-value was  $>0.05$ . One mouse each from JHU083-treated C3HeB/Fej and  
82 RIF-treated C3H groups died prematurely. The experiment was performed twice.

83

84

85

86

Fig S4.

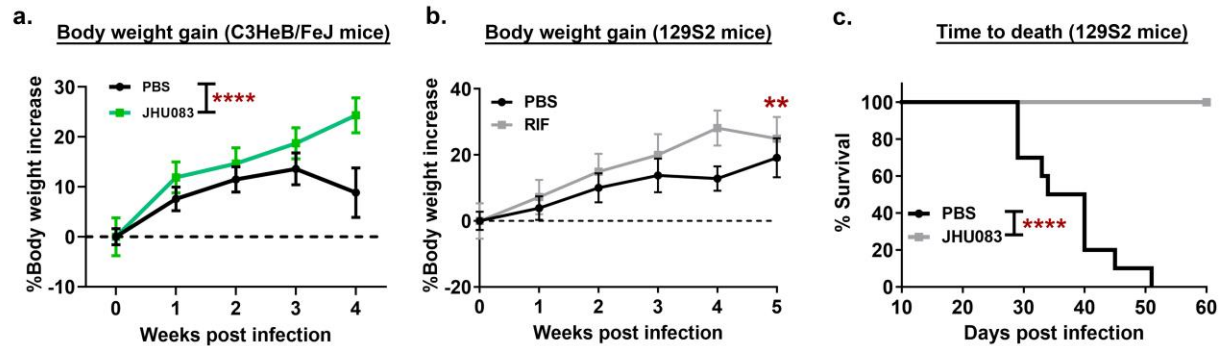

87

88 **Fig S4. JHU083 and RIF administration improved body weight and survival of *Mtb*-**

89 **infected mice.** 129S2 or C3HeB/FeJ mice were aerosol-infected with 200-300 CFU of *Mtb*

90 *H37Rv*. Next day of the infection, 1 mg/kg of JHU083 was given daily for the first five days,

91 and then the dose was reduced to 1 mg/kg on alternate days (3/7, M-F). 12.5 mg/kg RIF was

92 given daily orally for 5-weeks. The mice were then treated with JHU083 12.5 mg/kg RIF daily

93 via oral gavage starting one day after infection. The mice were sacrificed at day 0 and week 5

94 post-infection/treatment. Graphs depict (a) body weight gain in C3HeB/FeJ mice (n=10/group)

95 treated with PBS or JHU083 and, (b) body weight gain in 129S2 mice (n=5/group) treated with

96 PBS and RIF. (c) Survival of 129S2 mice (n=10/group) treated with RIF or PBS. Data is plotted

97 as mean  $\pm$  SEM. For body weight, a two-way Anova test was used for calculating statistical

98 significance. For survival curve, statistical significance was calculated using both Log-rank

99 (Mantel-Cox) and Gehan-Breslow-Wilcoxon tests. The exact p-values are provided in the

100 Source Data file. \*\*<0.01, \*\*\*\*<0.0001. The experiment was performed twice.

101

102

103

104

Fig S5

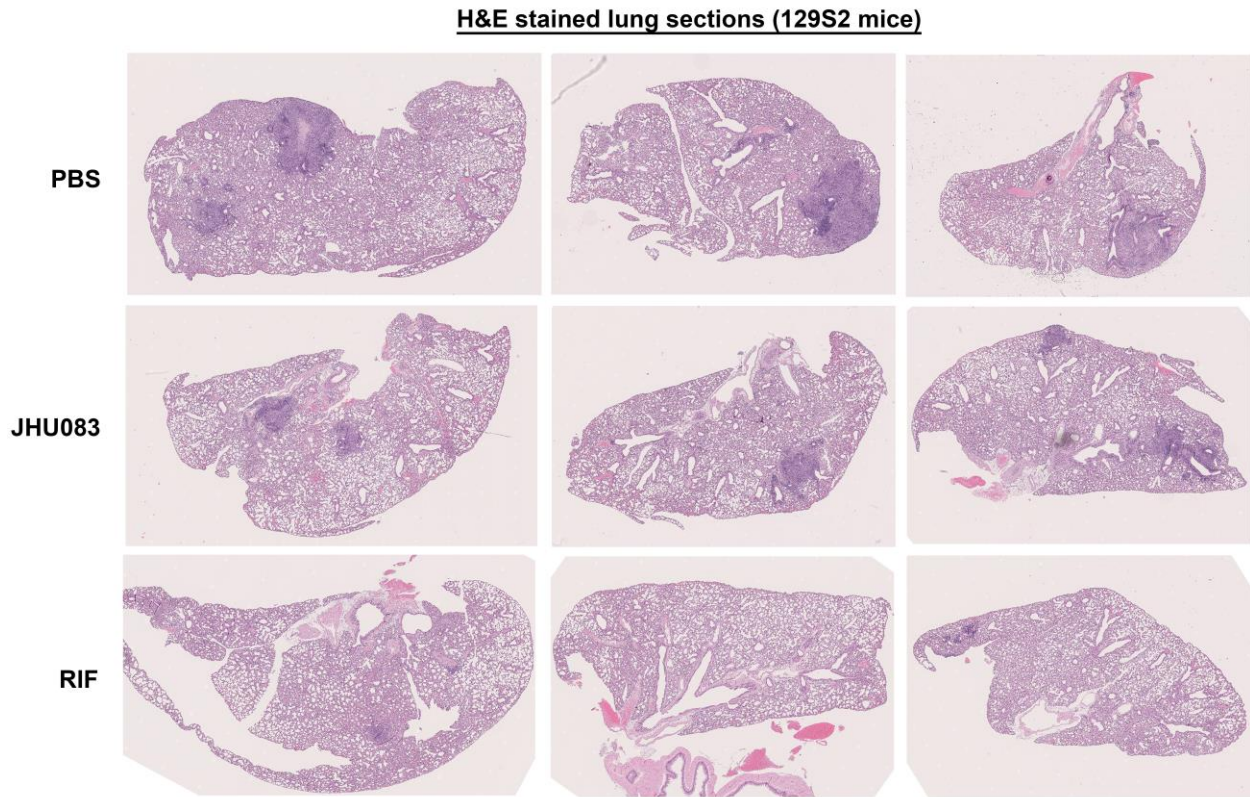

105

106 **Fig S5. The histopathology of the lungs isolated from 129S2 mice infected with *Mtb* H37Rv**  
107 **at week 5 post-infection/treatment.** 129S2 or C3HeB/FeJ mice (n=3/group) were aerosol  
108 infected with ~200-300 CFU of *Mtb* H37Rv. The mice were treated with JHU083 or RIF via oral  
109 route one day after infection. 1 mg/kg JHU083 was given daily for the first five days, and then  
110 the dose was reduced to 0.3 mg/kg daily (5/7, M-F). The lungs were formalin fixed, sectioned,  
111 and stained with hematoxylin and eosin. All the experiments were repeated at least twice.

112

113

114

115

116



Fig S6.

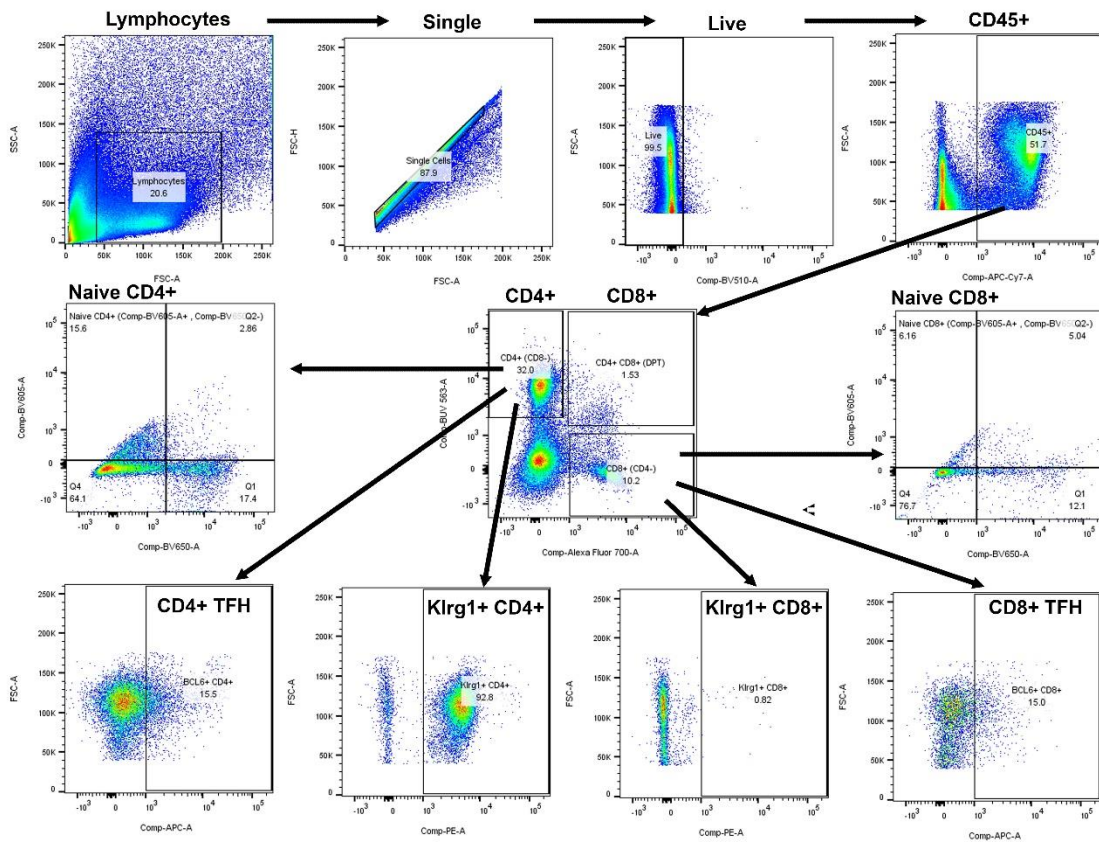

117

118 **Fig S6. Two-dimensional gating strategies for flow cytometrical identification of T-cell**  
 119 **subsets.** We excluded doublets and debris and gated on single live CD45<sup>+</sup> cells. We identified  
 120 CD4<sup>+</sup> T-cells (CD45<sup>+</sup> CD8<sup>-</sup> CD4<sup>+</sup>), CD8<sup>+</sup> T-cells (CD45<sup>+</sup> CD4<sup>-</sup> CD8<sup>+</sup>), Naïve CD4<sup>+</sup> T-cells  
 121 (CD45<sup>+</sup> CD8<sup>-</sup> CD4<sup>+</sup> CD44<sup>-</sup> CD26L<sup>+</sup>), Naïve CD8<sup>+</sup> T-cells (CD45<sup>+</sup> CD8<sup>+</sup> CD4<sup>-</sup> CD44<sup>-</sup> CD26L<sup>+</sup>),  
 122 Follicular helper CD4<sup>+</sup> T-cells (CD45<sup>+</sup> CD8<sup>-</sup> CD4<sup>+</sup> BCL6<sup>+</sup>), Follicular helper CD8<sup>+</sup> T-cells  
 123 (CD45<sup>+</sup> CD8<sup>+</sup> CD4<sup>-</sup> BCL6<sup>+</sup>), Klrp1<sup>+</sup> CD4<sup>+</sup> T-cells (CD45<sup>+</sup> CD8<sup>-</sup> CD4<sup>+</sup> Klrp1<sup>+</sup>), Klrp1<sup>+</sup> CD8<sup>+</sup> T-  
 124 cells (CD45<sup>+</sup> CD8<sup>+</sup> CD4<sup>-</sup> Klrp1<sup>+</sup>). All flow antibodies were titrated to identify the concentration  
 125 with maximum specificity coupled with minimum possible spillover. The gating strategy was  
 126 defined using single-stain and FMO controls (for low-expression markers).

127

Fig S7.

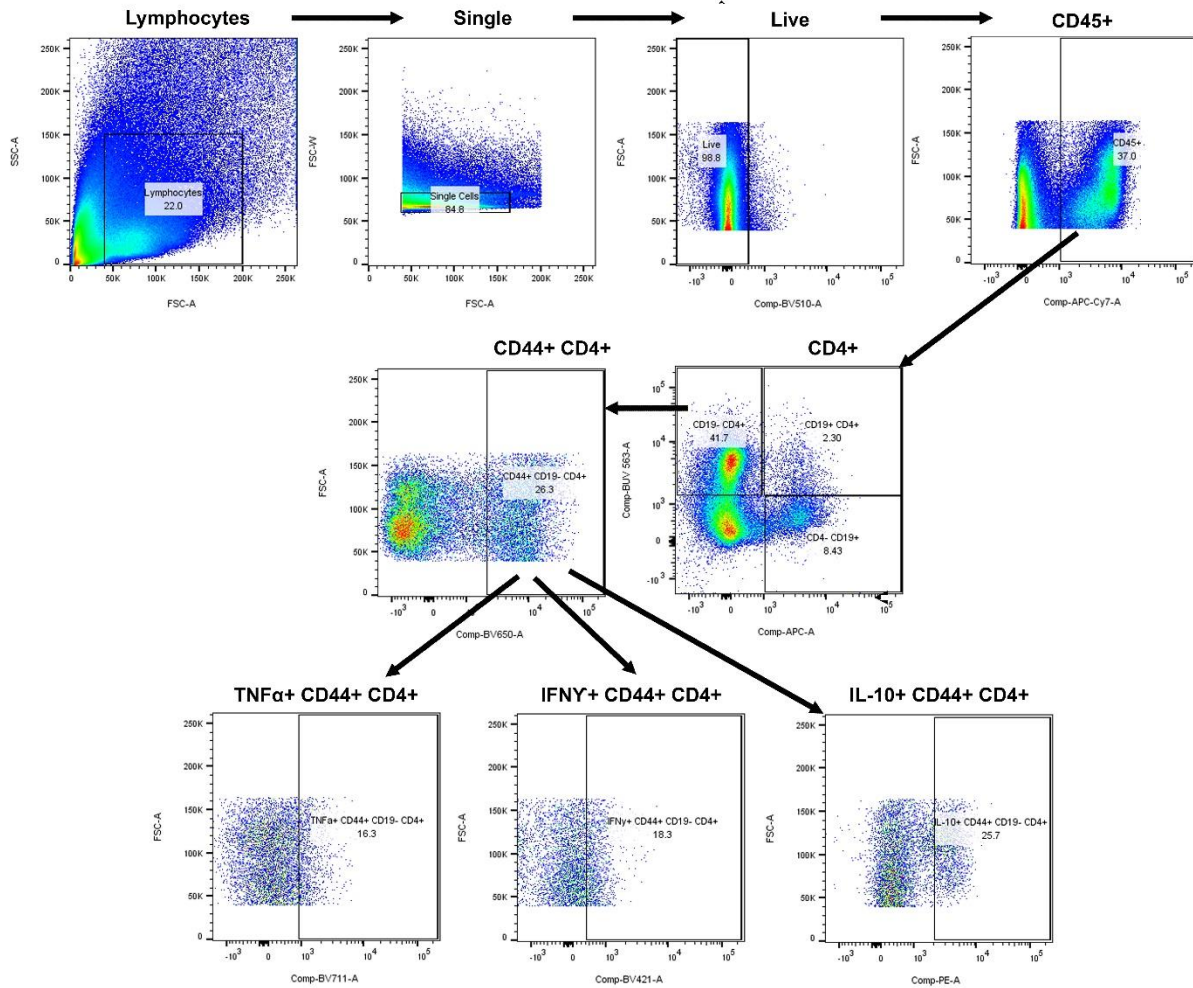

128

129 **Fig S7. Two-dimensional gating strategies for flow cytometrical identification of cytokine-**  
130 **producing T-cell subsets.** We excluded doublets and debris and gated on single live CD45+  
131 cells. We identified CD4<sup>+</sup> T-cells (CD45<sup>+</sup> CD19<sup>-</sup> CD4<sup>+</sup>), activated CD4<sup>+</sup> T-cells (CD45<sup>+</sup> CD19<sup>-</sup>  
132 CD44<sup>+</sup> CD4<sup>+</sup>), TNFα<sup>+</sup> activated CD4<sup>+</sup> T-cells (CD45<sup>+</sup> CD19<sup>-</sup> CD44<sup>+</sup> CD4<sup>+</sup> TNFα<sup>+</sup>), IFNγ<sup>+</sup>  
133 activated CD4<sup>+</sup> T-cells (CD45<sup>+</sup> CD19<sup>-</sup> CD44<sup>+</sup> CD4<sup>+</sup> IFNγ<sup>+</sup>) and IL-10<sup>+</sup> activated CD4<sup>+</sup> T-cells  
134 (CD45<sup>+</sup> CD19<sup>-</sup> CD44<sup>+</sup> CD4<sup>+</sup> IL10<sup>+</sup>). All flow antibodies were titrated to identify the concentration  
135 with maximum specificity coupled with minimum possible spillover. The gating strategy was  
136 defined using single-stain and FMO controls (for low-expression markers).



Fig S8.

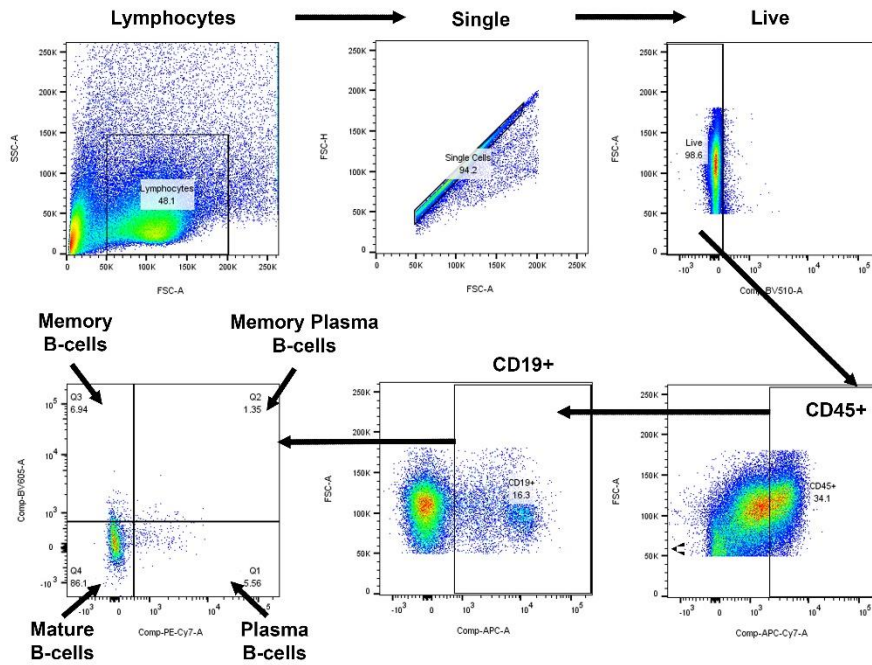

137

138 **Fig S8. Two-dimensional gating strategies for flow cytometrical identification of B cell**  
139 **subsets.** We excluded doublets and debris and gated on single live CD45<sup>+</sup> cells. We identified  
140 total T-cells (CD45<sup>+</sup> CD19<sup>+</sup>), mature B-cells (CD45<sup>+</sup> CD19<sup>+</sup> CD27<sup>-</sup> CD138<sup>-</sup>), memory B-cells  
141 (CD45<sup>+</sup> CD19<sup>+</sup> CD27<sup>+</sup> CD138<sup>-</sup>), plasma cells (CD45<sup>+</sup> CD19<sup>+</sup> CD27<sup>-</sup> CD138<sup>+</sup>), plasma memory  
142 B-cells (CD45<sup>+</sup> CD19<sup>+</sup> CD27<sup>+</sup> CD138<sup>+</sup>). All flow antibodies were titrated to identify the  
143 concentration with maximum specificity coupled with minimum possible spillover. The gating  
144 strategy was defined using single-stain and FMO controls (for low-expression markers).

145

146

147

148

149

150

151

Fig S9.

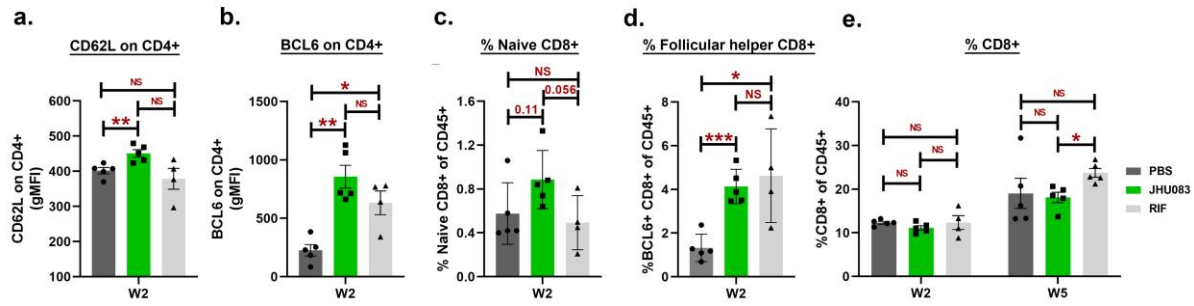

152

153

154 **Fig S9. Effect of JHU083 administration upon T-cells in the lungs at weeks 2 and 5.** As  
155 described in Fig 2a, *Mtb*-infected 129S2 mice were treated with JHU083 and RIF every day  
156 starting day 1 post-infection. The mice were sacrificed at week 2 and week 5, and the lungs were  
157 harvested. Single cell suspensions of the lungs from all three groups were stained with  
158 appropriate antibodies and analyzed using multicolor-flow cytometry (n=5/group except RIF-  
159 treated group in graph panels a-d where n=4). We found differences in the (a) CD62L  
160 expression upon CD4<sup>+</sup> T-cells, (b) BCL6 expression upon CD4<sup>+</sup> T-cells, (c) frequency of naïve  
161 CD8<sup>+</sup> T-cells, (d) frequency of follicular helper CD8<sup>+</sup> T-cells and, (e) total CD8<sup>+</sup> T-cells The X-  
162 axis shows the timepoint at which the lungs were harvested for the flow cytometry analysis.  
163 Data were plotted as Mean ± SEM and are shown as the frequency of CD45<sup>+</sup> population. gMFI  
164 stands for geometric mean fluorescence intensity and was used to define the expression of the  
165 individual markers upon the indicated cell types. Statistical significance was calculated using a  
166 two-tailed student t-test considering unequal distribution. The exact p-values are provided in the  
167 Source Data file. \*<0.05, \*\*<0.01, \*\*\*<0.001. CFU stands for colony-forming units. NS stands  
168 for non-significant change, p-value was >0.05. The experiment was repeated two times.

169

170

171

172

173

**Fig S10.**

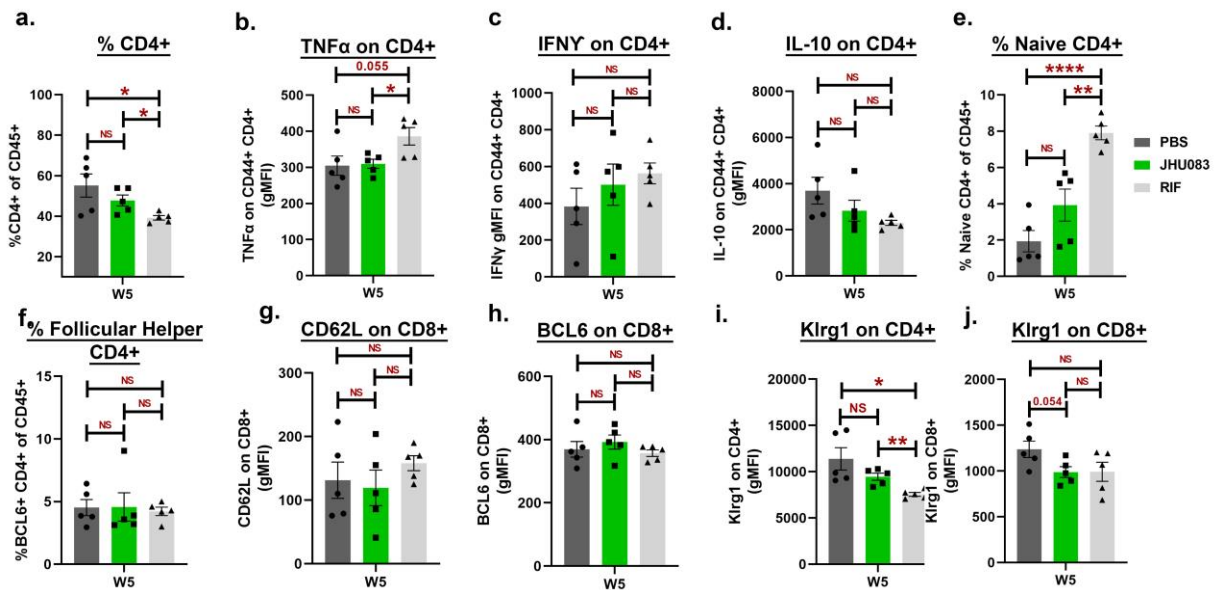

174

175 **Fig S10. Effect of JHU083 administration upon T-cells in the lungs at week 5.** As described  
176 in Fig 2a, *Mtb*-infected 129S2 mice (n=5/group) were treated with JHU083 and RIF every day  
177 starting day 1 post-infection. The mice were sacrificed at week 2 and week 5, and the lungs were  
178 harvested. Single cell suspensions of the lungs from all three groups were stained with  
179 appropriate antibodies and analyzed using multicolor-flow cytometry (n=4-5). We found no  
180 difference in the (a) CD4<sup>+</sup> T-cell frequency, (b) TNF $\alpha$  expression upon activated CD4<sup>+</sup> T-cells,  
181 (c) IFN $\gamma$  expression upon activated CD4<sup>+</sup> T-cells, (d) IL-10 expression upon activated CD4<sup>+</sup> T-  
182 cells, (e) Naive CD4<sup>+</sup> T-cells, (f) Follicular helper T-cells, (g) CD62L expression on CD8<sup>+</sup> T-  
183 cells, (h) BCL6 expression on CD8<sup>+</sup> T-cells, (i) Klrg1 expression on CD4<sup>+</sup> T-cells, (j) Klrg1  
184 expression on CD8<sup>+</sup> T-cells. The X-axis shows the timepoint at which the lungs were harvested  
185 for flow cytometry analysis. Data were plotted as Mean  $\pm$  SEM and are shown as the frequency  
186 of CD45<sup>+</sup> population. gMFI stands for geometric mean fluorescence intensity and was used to  
187 define the expression of the individual markers upon the indicated cell types. gMFI was mostly  
188 used for low abundance cell surface markers and transcription factors. Statistical significance  
189 was calculated using a two-tailed student t-test considering unequal distribution. The exact p-  
190 values are provided in the Source Data file. \*<0.05, \*\*<0.01, \*\*\*<0.001, \*\*\*\*<0.0001. CFU  
191 stands for colony-forming units. NS stands for non-significant change, p-value was >0.05. The  
192 experiment was repeated twice.

Fig S11.

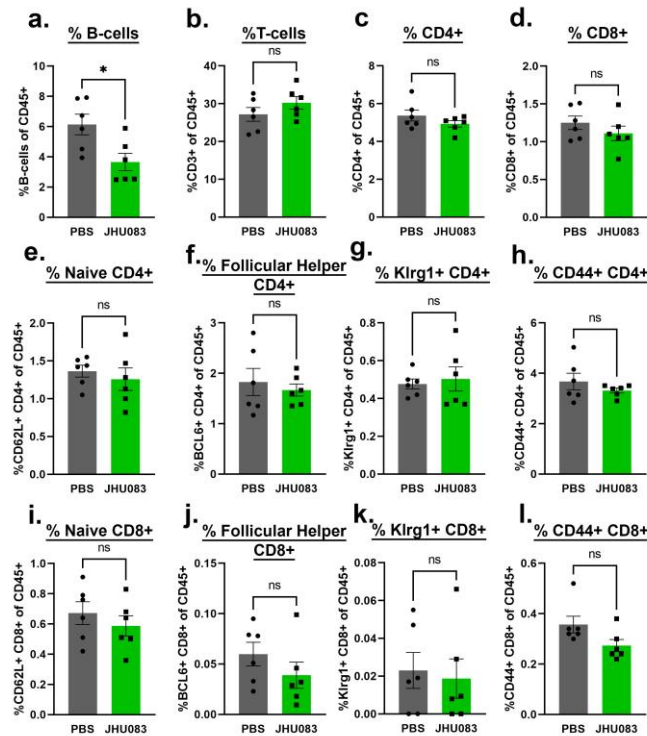

194

195 **Fig S11. Effect of JHU083 administration upon T-cell subsets in uninfected 129S2 mice**

196 **lungs at week 2.** Uninfected six to ten weeks old female 129S2 mice (n=6/group) were treated  
 197 with JHU083 every day. The mice were sacrificed at week 2, and the lungs were harvested.

198 Single cell suspensions of the lungs from all three groups were stained with appropriate  
 199 antibodies and analyzed using multicolor-flow cytometry. We found (a) reduced frequency of  
 200 B-cells. While there was no difference in the frequency of (b) CD3<sup>+</sup> T-cells, (c) CD4<sup>+</sup> T-cells,  
 201 (d) CD8<sup>+</sup> T-cells, (e) Naïve CD4<sup>+</sup> T-cells, (f) Follicular helper CD4<sup>+</sup> T-cells, (g) proliferating  
 202 Ki67<sup>+</sup> CD4<sup>+</sup> T-cells, (h) activated CD44<sup>+</sup> CD4<sup>+</sup> T-cells, (i) Naïve CD8<sup>+</sup> T-cells, (j) Follicular  
 203 helper CD8<sup>+</sup> T-cells, (k) proliferating Ki67<sup>+</sup> CD8<sup>+</sup> T-cells and, (l) activated CD44<sup>+</sup> CD8<sup>+</sup> T-cells.

204 Data were plotted as Mean ± SEM and are shown as the frequency of CD45<sup>+</sup> population.

205 Statistical significance was calculated using a two-tailed student t-test considering unequal

206 distribution. The exact p-values are provided in the Source Data file. \*<0.05. CFU stands for

207 colony-forming units. NS stands for non-significant change, p-value was >0.05. The experiment

208 was performed twice.

Fig S12.

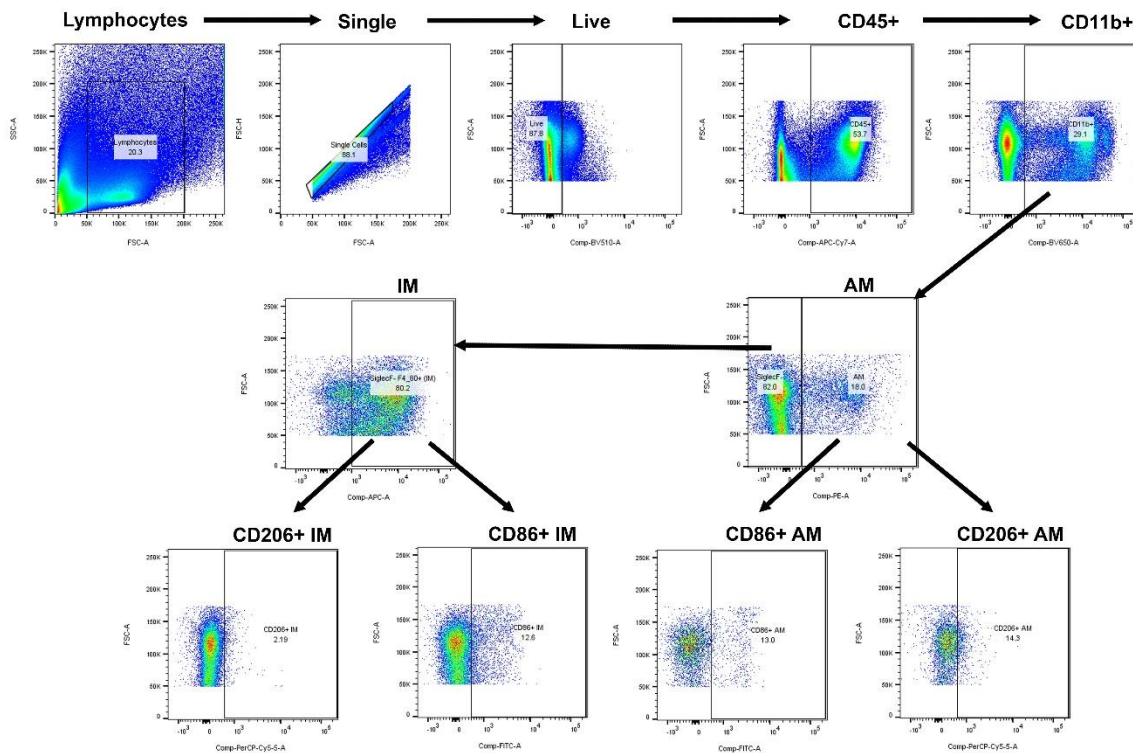

210

211 **Fig S12. Two-dimensional gating strategies for flow cytometrical identification of myeloid**  
 212 **cell subsets.** We excluded doublets and debris and gated on single live CD45<sup>+</sup> cells. We  
 213 identified myeloid cells (CD45<sup>+</sup> CD11b<sup>+</sup>), alveolar macrophages (AM; CD45<sup>+</sup> CD11b<sup>+</sup>  
 214 SiglecF<sup>+</sup>), interstitial macrophages (IM; CD45<sup>+</sup> CD11b<sup>+</sup> SiglecF<sup>-</sup> F4/80<sup>+</sup>), CD86<sup>+</sup> alveolar  
 215 macrophages (AM; CD45<sup>+</sup> CD11b<sup>+</sup> SiglecF<sup>+</sup> CD86<sup>+</sup>), CD206<sup>+</sup> alveolar macrophages (AM;  
 216 CD45<sup>+</sup> CD11b<sup>+</sup> SiglecF<sup>+</sup> CD206<sup>+</sup>), CD86<sup>+</sup> interstitial macrophages (IM; CD45<sup>+</sup> CD11b<sup>+</sup>  
 217 SiglecF<sup>-</sup> F4/80<sup>+</sup> CD86<sup>+</sup>), CD206<sup>+</sup> interstitial macrophages (IM; CD45<sup>+</sup> CD11b<sup>+</sup> SiglecF<sup>-</sup> F4/80<sup>+</sup>  
 218 CD206<sup>+</sup>). All flow antibodies were titrated to identify the concentration with maximum specificity  
 219 coupled with minimum possible spillover. The gating strategy was defined using single-stain and  
 220 FMO controls (for low-expression markers).

221

Fig S13.

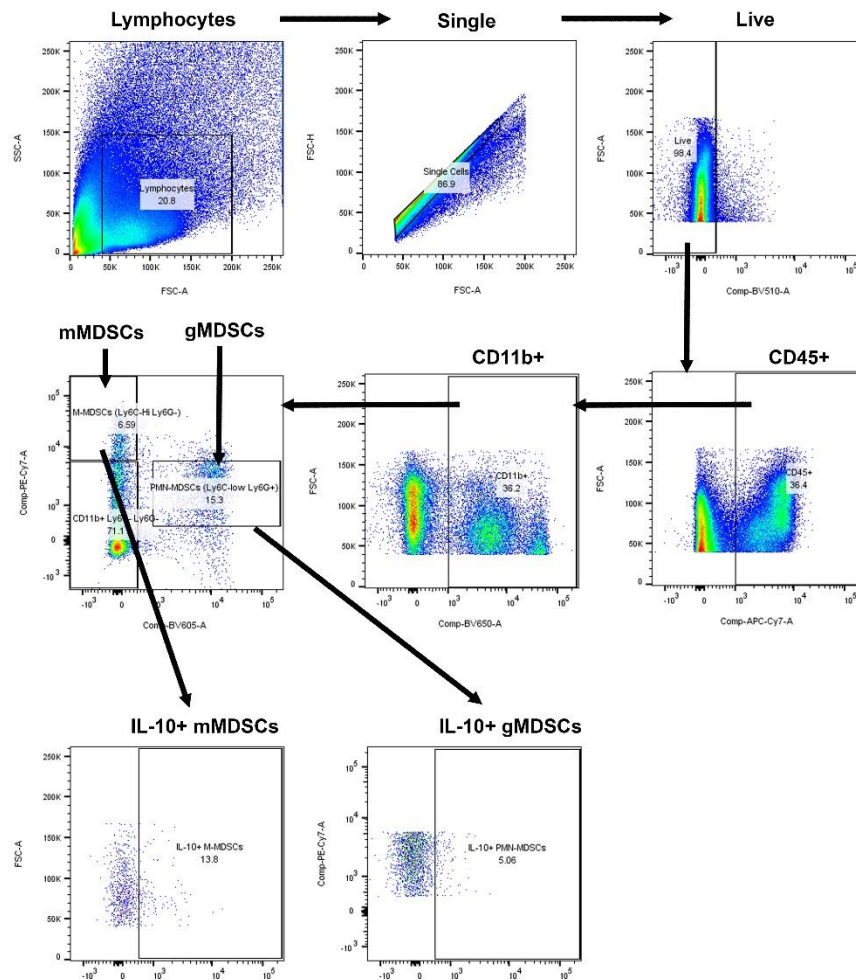

222

223 **Fig S13. Two-dimensional gating strategies for flow cytometrical identification of MDSC**  
224 **subsets.** We excluded doublets and debris and gated on single live CD45<sup>+</sup> cells. We identified  
225 myeloid cells (CD45<sup>+</sup> CD11b<sup>+</sup>), monocytic MDSCs (CD45<sup>+</sup> CD11b<sup>+</sup> Ly6G<sup>-</sup> Ly6C<sup>High</sup>), IL-10<sup>+</sup>  
226 monocytic MDSCs (CD45<sup>+</sup> CD11b<sup>+</sup> Ly6G<sup>-</sup> Ly6C<sup>High</sup>, IL-10<sup>+</sup>), granulocytic MDSCs (CD45<sup>+</sup>  
227 CD11b<sup>+</sup> Ly6G<sup>+</sup> Ly6C<sup>low</sup>), granulocytic MDSCs (CD45<sup>+</sup> CD11b<sup>+</sup> Ly6G<sup>+</sup> Ly6C<sup>low</sup>, IL-10<sup>+</sup>). All  
228 flow antibodies were titrated to identify the concentration with maximum specificity coupled with  
229 minimum possible spillover. The gating strategy was defined using single-stain and FMO controls  
230 (for low-expression markers).



**Fig S14.**

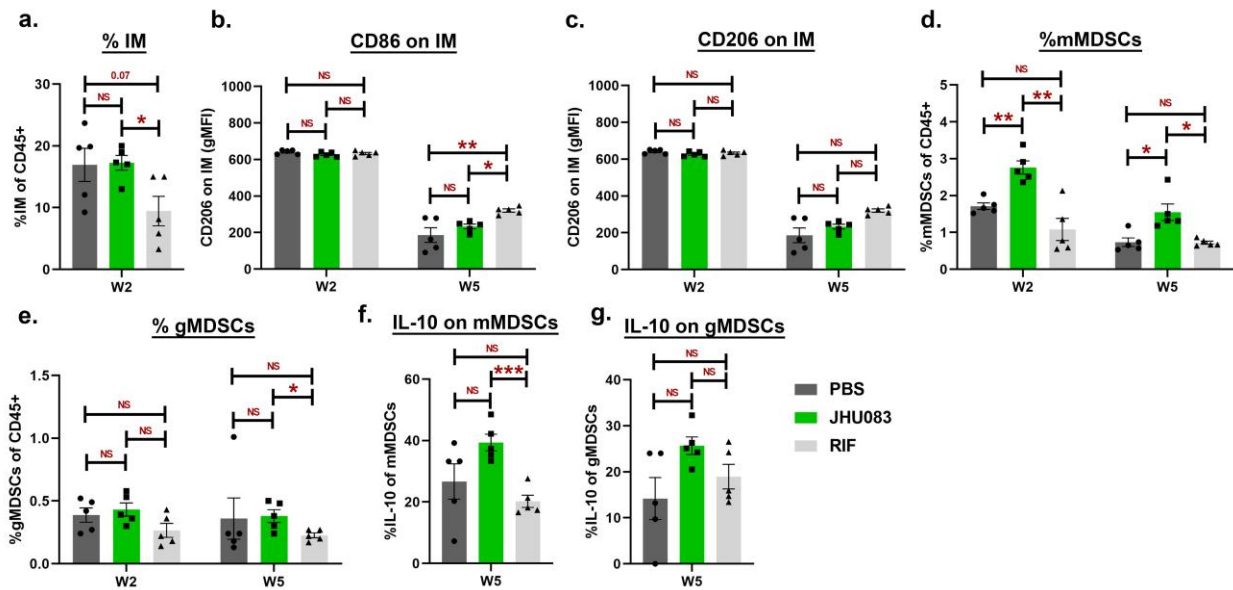

231

232 **Fig S14. Effect of JHU083 treatment upon myeloid cell subsets.** As described in Fig 2a,  
 233 *Mtb*-infected female 129S2 mice (n=5/group) were treated with JHU083 and RIF every day  
 234 starting day 1 post-infection. The mice were sacrificed at week 2 and week 5, and the lungs were  
 235 harvested. Single cell suspension of the lungs from all three groups were stained with  
 236 appropriate antibodies and analyzed using multicolor-flow cytometry (n=5). Details are  
 237 provided in “Methods” section. We found no difference in the (a) interstitial macrophages (IM),  
 238 (b) CD86 expression on IM, (c) CD206 expression on IM, (d) monocytic myeloid-derived  
 239 suppressor cells (mMDSCs), (e) granulocytic myeloid-derived suppressor cells (gMDSCs), (f)  
 240 IL-10 expression upon mMDSCs, (g) IL-10 expression upon gMDSCs. The X-axis shows the  
 241 timepoint at which the lungs were harvested for flow cytometry analysis. Data were plotted as  
 242 Mean ± SEM and are shown as the frequency of CD45<sup>+</sup> population. gMFI stands for geometric  
 243 mean fluorescence intensity and was used to define the expression of the individual markers  
 244 upon the indicated cell types. gMFI was mostly used for low abundance cell surface markers  
 245 and transcription factors. Statistical significance was calculated using a two-tailed student t-test  
 246 considering unequal distribution. The exact p-values are provided in the Source Data file.  
 247 \*<0.05, \*\*<0.01, \*\*\*<0.001, \*\*\*\*<0.0001. CFU stands for colony-forming units. NS stands for  
 248 non-significant change, p-value was >0.05. The experiment was repeated two times.

249

Fig S15.

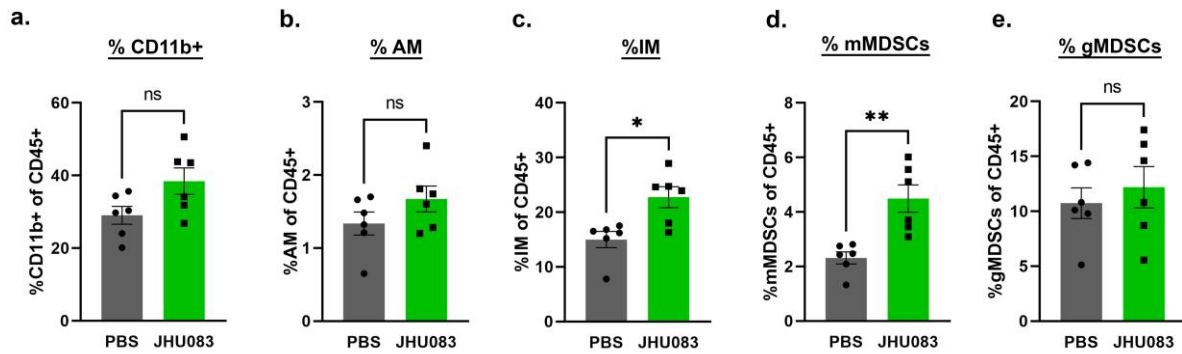

250

251 **Fig S15. Effect of JHU083 administration upon myeloid cell subsets in uninfected 129S2**  
252 **mice lungs at week 2.** Uninfected 129S2 mice (n=6/group) were treated with JHU083 every  
253 day. The mice were sacrificed at week 2, and the lungs were harvested. Single cell suspensions  
254 of the lungs from all three groups were stained with appropriate antibodies and analyzed using  
255 multicolor-flow cytometry. We found no difference in the (a) CD11b+ myeloid cells and, (b)  
256 alveolar macrophages (AM). There was increased frequency of (c) interstitial macrophages (IM)  
257 and, (d) monocytic MDSC (mMDSCs) while (e) frequency of granulocytic MDSC (gMDSCs)  
258 remained unaltered. Data were plotted as Mean  $\pm$  SEM and are shown as the frequency of  
259 CD45<sup>+</sup> population. Statistical significance was calculated using a two-tailed student t-test  
260 considering unequal distribution. The exact p-values are provided in the Source Data file.  
261 \*<0.05. CFU stands for colony-forming units. NS stands for non-significant change, p-value  
262 was >0.05. The experiment was performed twice.

263

264

265

266

267

268

269

Fig S16.

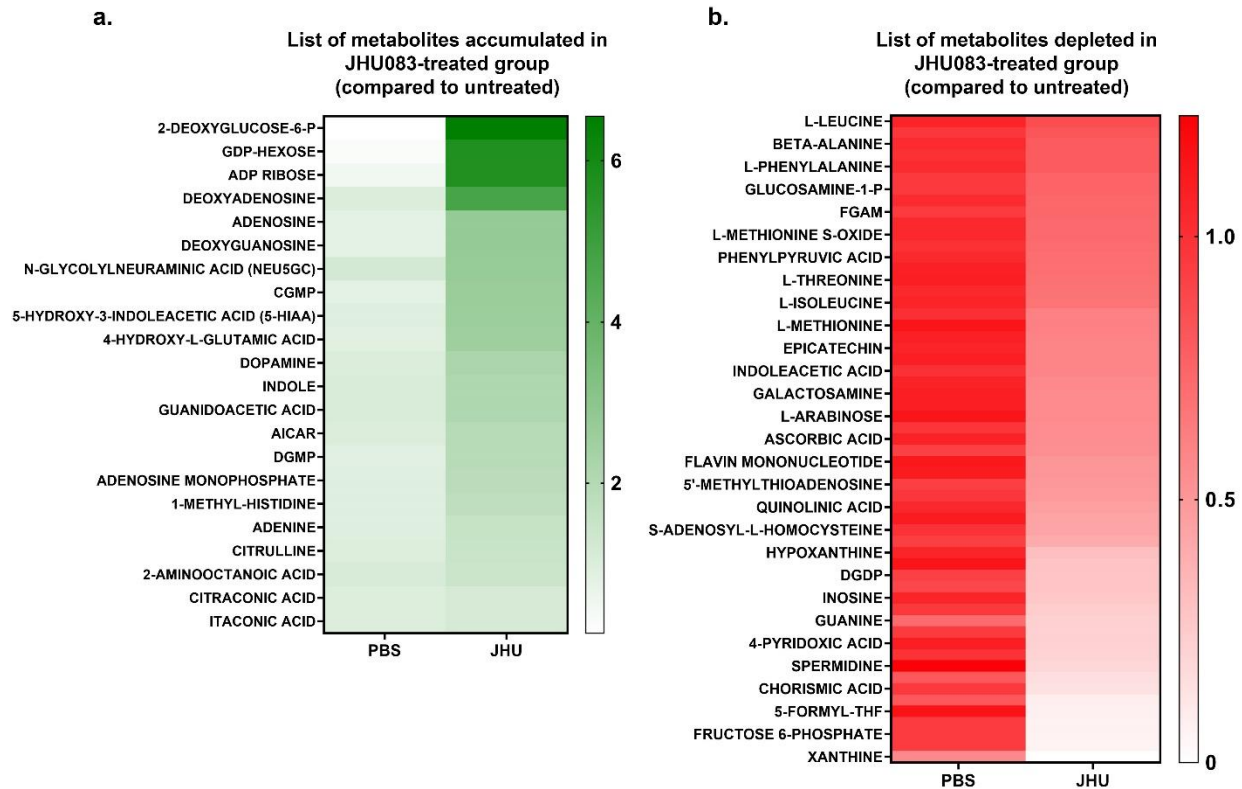

271

272 **Fig S16. Heatmap representing the top metabolites that were either (a) enriched or (b)**  
 273 **depleted in the lungs harvested from the animals treated with JHU083 (right-lane)**  
 274 **compared to untreated group (left lane).** The metabolites were methanol-extracted from the  
 275 total lungs harvested at week 2 post infection and treatment (n=5/group). The metabolite  
 276 abundance was normalized to the total lung tissue used for the extraction and untreated control.  
 277 Statistical significance was calculated using a two-tailed student t-test considering unequal  
 278 distribution. The exact p-values are provided in the Source Data file. The experiment was  
 279 performed twice.

280

281

282

Fig S17.

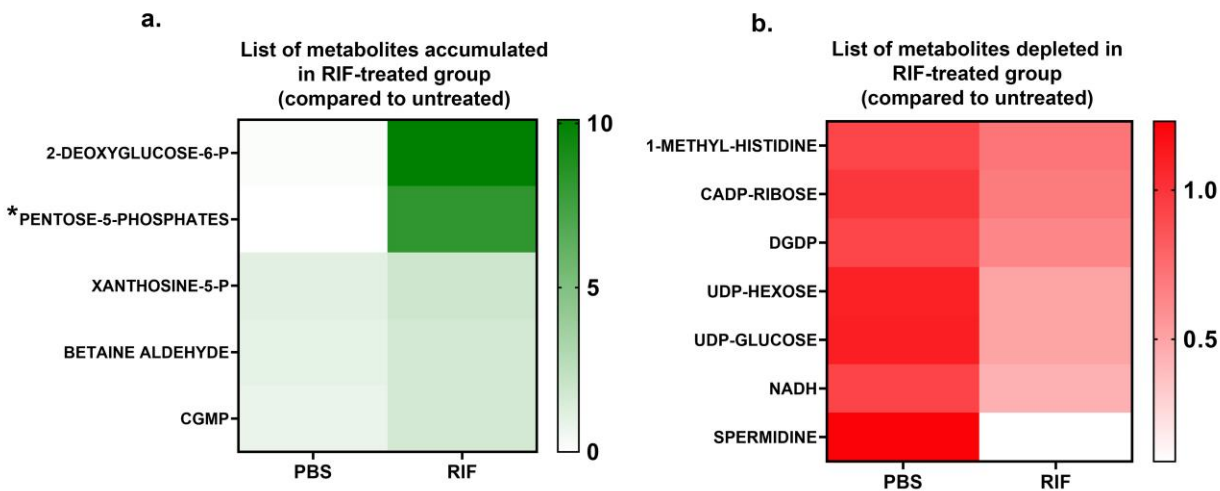

283

284 **Fig S17. Heatmap representing the top metabolites that were either (a) enriched or (b)**  
285 **depleted in the lungs harvested from the animals treated with RIF (right-lane) compared to**  
286 **untreated group (left lane).** The metabolites were methanol-extracted from the total lungs  
287 harvested at week 2 post infection and treatment (n=5/group). The metabolite abundance was  
288 normalized to the total lung tissue used for the extraction and untreated control. The exact p-  
289 values are provided in the Source Data file. Statistical significance was calculated using a two-  
290 tailed student t-test considering unequal distribution. \*Pentose-5-phosphates include arabinose-5-  
291 phosphate, ribose-5-phosphate, and xylulose-5-phosphate. These three molecules have identical  
292 MW and RT and hence, are indistinguishable based on mass-spectrometry. The experiment was  
293 performed twice.

294

295

296

297

298

299

300

**Fig S18.**

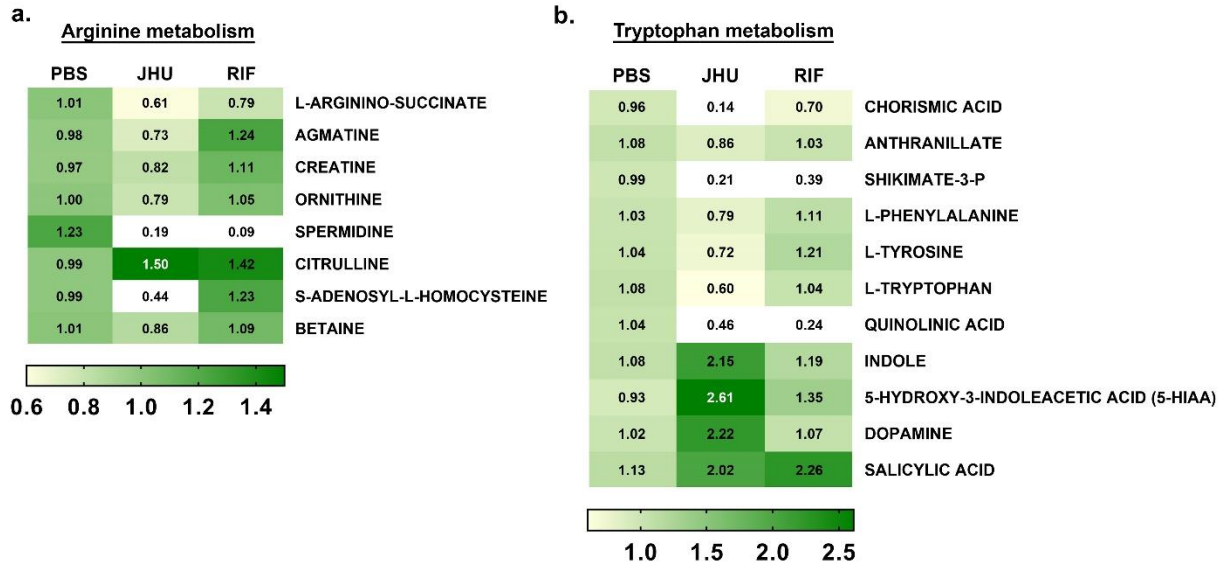

301

302 **Fig S18. Heatmaps listing the metabolites that are affected by JHU083-treatment.** As  
 303 described in Fig 2a, *Mtb*-infected 129S2 mice were treated with JHU083 and RIF every day  
 304 starting day 1 post-infection (n=5/group). Mice were sacrificed at week 2, the lungs were  
 305 harvested, and total metabolites were methanol extracted as described in “Methods”. The total  
 306 metabolites were normalized to the tissue weight and then to the untreated controls. We detected  
 307 changes in the level of metabolites belonging to both **(a)** arginine and, **(b)** tryptophan  
 308 metabolism pathways. Statistical significance was calculated using a two-tailed student t-test  
 309 considering unequal distribution. The values in the cells correspond to the median value of the  
 310 dataset. The experiment was performed once. The metabolomics data is provided as a separate  
 311 excel sheet with normalized values along with the p-value calculations. The exact p-values are  
 312 provided in the Source Data file. The experiment was performed twice.

313

314

315

316

317

Fig S19.

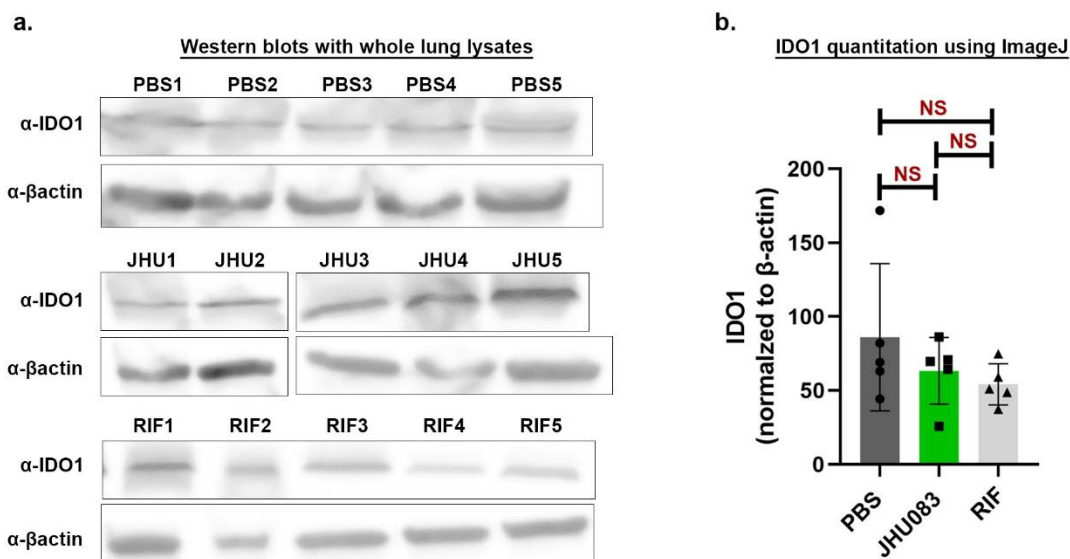

318

319 **Fig S19. JHU083 administration does not alter the IDO1 levels in *Mtb*-infected lungs. As**  
320 **described in Fig 2a**, six to ten weeks old 129S2 female mice (n=5/group) were aerosol infected  
321 with ~200-300 CFU of *Mtb H37Rv*. The mice were treated with JHU083 or RIF via oral route  
322 one day after infection. 1 mg/Kg JHU083 was given daily for the first five days, and then the  
323 dose was reduced to 0.3 mg/Kg daily (M-F). The mice were sacrificed at week 2 post-  
324 infection/treatment. The lungs were harvested and homogenized to prepare whole lung lysate.  
325 Lung lysate corresponding to 10  $\mu$ g protein was loaded per lane, electrophoresed, transferred to  
326 PVDF membrane. The level of IDO1 and  $\beta$ -actin was determined using specific primary  
327 antibody specified in the materials and methods section. (a) Western blot showing the IDO1 and  
328  $\beta$ -actin levels in whole lung lysate from all three treatment groups. (b) Quantitation of IDO1  
329 levels in the whole lung lysate using ImageJ based densitometry. Data were plotted as Mean  $\pm$   
330 SEM. Statistical significance was calculated using a two-tailed student t-test considering  
331 unequal distribution. The exact p-values are provided in the Source Data file. CFU stands for  
332 colony-forming units. NS stands for non-significant change, p-value was >0.05. The experiment  
333 was repeated twice.

334

335



Fig S20.

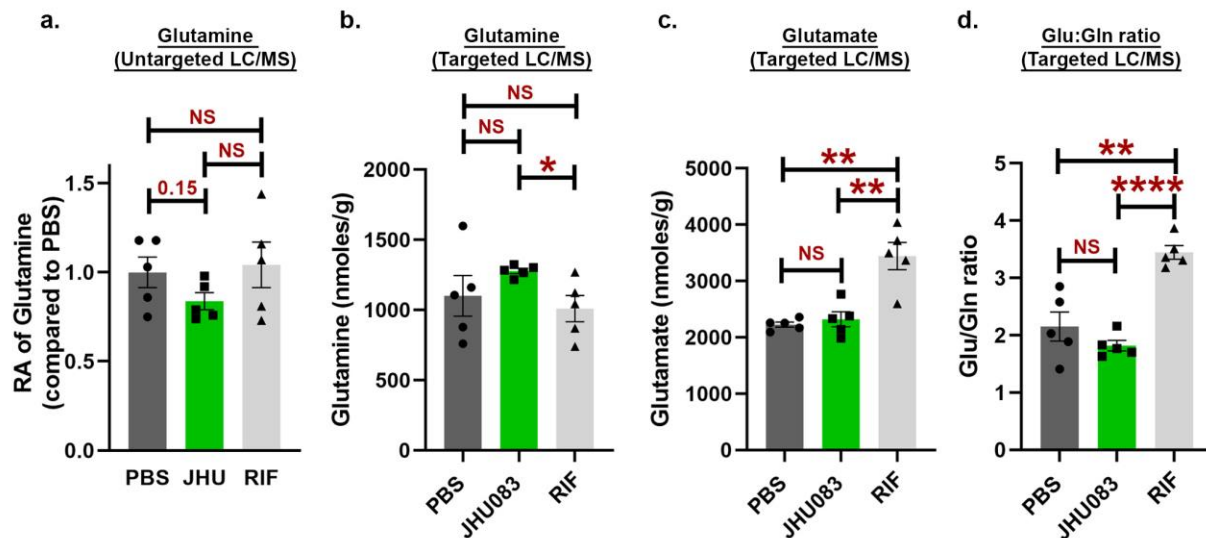

337

338 **Fig S20. JHU083 treatment does not alter glutamine level in the *Mtb*-infected lungs.** As  
 339 described in Fig 2a, *Mtb*-infected 129S2 mice (n=5/group) were treated with JHU083 and RIF  
 340 every day starting day 1 post-infection. Mice were sacrificed at week 2, the lungs were  
 341 harvested, and total metabolites were methanol extracted as described in “Methods”. The total  
 342 metabolites were normalized to the tissue weight and then to the untreated controls. We detected  
 343 no change in the level of (a) glutamine as per the untargeted metabolomics. We also observed  
 344 no change in the levels of (b) glutamine, (c) glutamate and (d) glutamate and glutamine ratio,  
 345 quantified as per targeted metabolomics. Data were plotted as Mean  $\pm$  SEM. Statistical  
 346 significance was calculated using a two-tailed student t-test considering unequal distribution.  
 347 The exact p-values are provided in the Source Data file. \* $<0.05$ , \*\* $<0.01$ , \*\*\* $<0.001$ ,  
 348 \*\*\*\* $<0.0001$ . CFU stands for colony-forming units. NS stands for non-significant change, p-  
 349 value was  $>0.05$ . The experiment was repeated twice.

350

351

352

353

354 **LEGEND FOR TABLE**

355 **Supplementary Data 1:** As described in Fig 2a, *Mtb*-infected 129S2 mice (n=5/group) were  
356 treated with JHU083 and RIF daily starting day 1 post-infection. Mice were sacrificed at weeks  
357 2 and 5, the lungs were harvested, and total metabolites were extracted with methanol as  
358 described in “Methods.” Sheet 1, labeled “Sample details,” includes the description of all the  
359 samples that were used for the experiment. Sheet 2, labeled “Week 2\_Normalized data” lists all  
360 the metabolites that were identified in the *Mtb*-infected lungs week 2 post-infection/treatment.  
361 The metabolite abundances were normalized to the tissue weight and then to the untreated  
362 controls. Data were plotted as Mean  $\pm$  SEM. Statistical significance was calculated using a two-  
363 tailed student t-test considering unequal distribution. The exact p-values are provided in the  
364 table. Sheet 3, labeled “Week 5\_Normalized data” lists all the metabolites that were identified in  
365 the *Mtb*-infected lungs, week 5 post-infection/treatment. The metabolite abundances were  
366 normalized to the tissue weight and then to the untreated controls. Data were plotted as Mean  $\pm$   
367 SEM. Statistical significance was calculated using a two-tailed student t-test considering  
368 unequal distribution. The exact p-values are provided in the table. Sheet 4, labeled “All  
369 metabolites” lists the metabolites that were expected to give a peak on the MS spectra. The  
370 values represent the area under the curve for individual metabolite peaks, present in *Mtb*-infected  
371 lungs weeks 2 and 5 post-infection/treatment. Zero indicates that we could not detect the  
372 specified metabolite peak in the corresponding sample. Sheet 5, labeled “Metabolites with signal  
373 peak” lists all the metabolites that were detected in the *Mtb*-infected lungs weeks 2 and 5 post-  
374 infection/treatment. The values represent the area under the curve for individual metabolite  
375 peaks, present in *Mtb*-infected lungs weeks 2 and 5 post-infection/treatment. on the  
376 corresponding mass spectra. Sheet 6, labeled “Metabolites with no signal peak” lists all the  
377 metabolites that could not be detected in the *Mtb*-infected lungs, weeks 2 and 5 post-  
378 infection/treatment. The values represent the area under the curve for individual metabolite peaks  
379 observed on the corresponding mass spectra.

380

381

382
